# Supplementary material
Source: Springer Nature journal article supplement (https://www.springermedizin.de/resource/supplementary/13019_2009_213_MOESM2_ESM.pdf/9638086)

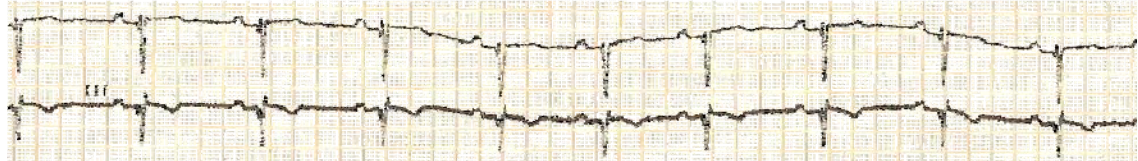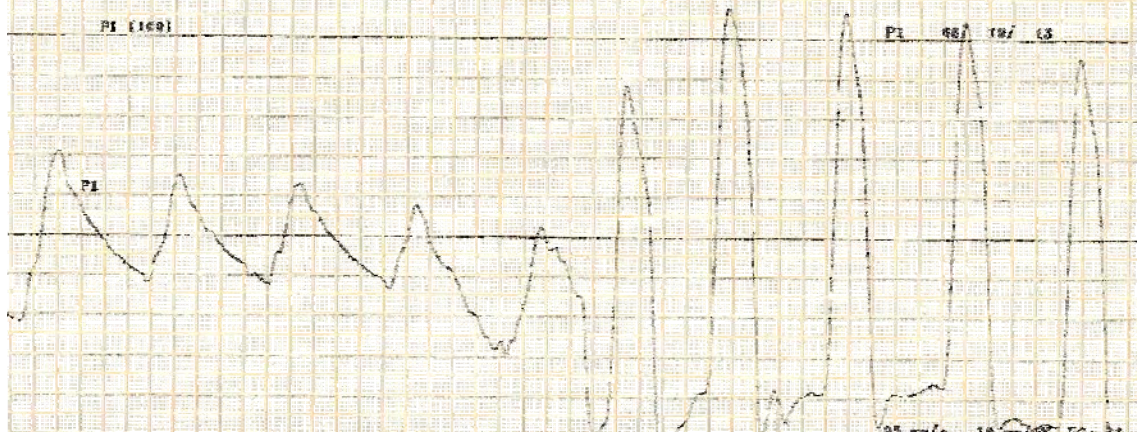

25-04-56 16:17.27

EDr

HOMI CATHEROP Cambridge

25 mm/s 16 mm/mV PC: 31  
Model 6-1000000

Supplement: MOESM2 [file 9638086]
